# Supplementary material for: Improving Grapevine Heat Stress Resilience with Marine Plant Growth-Promoting Rhizobacteria Consortia
Source: MDPI journal article supplement (doi:10.3390/microorganisms11040856), 2023-03-27
Supplement: s1 [file s1]

**Supplementary Table S1.** Summary of fluorometric analysis parameters and their description.

| <b>Fv/Fm</b>                | <b>Photosystem II (PS II) quantum yield.</b>                                                                                  |
|-----------------------------|-------------------------------------------------------------------------------------------------------------------------------|
| Area                        | Area above the Kaustky curve, proportional to the size of the oxidized quinone pool.                                          |
| N                           | Quinone redox turnover rate.                                                                                                  |
| $\gamma$ RC                 | The probability that a chlorophyll <i>a</i> molecule functions as a light-harvesting reaction centre.                         |
| $\delta R_0$                | The efficiency of the transfer of an electron from PQH <sub>2</sub> to final PS I acceptors.                                  |
| M <sub>0</sub>              | The net rate of PS II RC closure.                                                                                             |
| SM                          | Corresponds to the energy needed to close all reaction centers.                                                               |
| V <sub>K</sub>              | Relative variable fluorescence K-step.                                                                                        |
| V <sub>J</sub>              | Relative variable fluorescence J-step.                                                                                        |
| K-band amplitude            | The amplitude of the K-step ( $W_K = V_K - V_J$ ).                                                                            |
| $\psi_{E0}/(1 - \psi_{E0})$ | The equilibrium constant for the redox reactions between PS II and PS I                                                       |
| PI                          | Performance index on absorption basis, incorporating the steps of antenna, reaction centre and electron transport parameters. |
| RC/ABS                      | Reaction centre II density within the antenna chlorophyll bed of PS II                                                        |
| SFI                         | Structure functional index for photosynthesis.                                                                                |
| SFI (NPQ)                   | Non-photosynthetic or dissipation structure functional index.                                                                 |
| ABS/RC                      | Absorbed energy flux by reaction centre (RC).                                                                                 |
| TR/RC                       | Trapped energy flux by reaction centre (RC).                                                                                  |
| ET/RC                       | Electron transport energy flux by reaction centre (RC).                                                                       |
| DI/RC                       | Dissipated energy flux by reaction centre (RC).                                                                               |
| RC/CS                       | The number of available reaction centres per cross-section.                                                                   |
